# Supplementary material for: Therapeutic targeting of SLC6A8 creatine transporter suppresses colon cancer progression and modulates human creatine levels
Source: PubMed Central journal article supplement — Sci Adv. 2021 Oct 6;7(41):eabi7511. doi: 10.1126/sciadv.abi7511 (PMC8494442; doi:10.1126/sciadv.abi7511), 2021-10-06
Supplement: sciadv.abi7511_sm.pdf [file sciadv.abi7511_sm.pdf]

Supplementary Materials for

**Therapeutic targeting of SLC6A8 creatine transporter suppresses colon cancer progression and modulates human creatine levels**

Isabel Kurth\*, Norihiro Yamaguchi, Celia Andreu-Agullo, Helen S. Tian, Subhasree Sridhar, Shugaku Takeda, Foster C. Gonsalves, Jia Min Loo, Afsar Barlas, Katia Manova-Todorova, Robert Busby, Johanna C. Bendell, James Strauss, Marwan Fakih, Autumn J. McRee, Andrew E. Hendifar, Lee S. Rosen, Andrea Cercek, Robert Wasserman, Michael Szarek, Scott L. Spector, Syed Raza, Masoud F. Tavazoie\*, Sohail F. Tavazoie\*

\*Corresponding author. Email: [isabel.kurth@inspina.com](mailto:isabel.kurth@inspina.com) (I.K.); [masoud.tavazoie@inspina.com](mailto:masoud.tavazoie@inspina.com) (M.F.T.); [stavazoie@rockefeller.edu](mailto:stavazoie@rockefeller.edu) (S.F.T.)

Published 6 October 2021, *Sci. Adv.* 7, eabi7511 (2021)  
DOI: 10.1126/sciadv.abi7511

**This PDF file includes:**

Figs. S1 to S6  
Tables S1 and S2

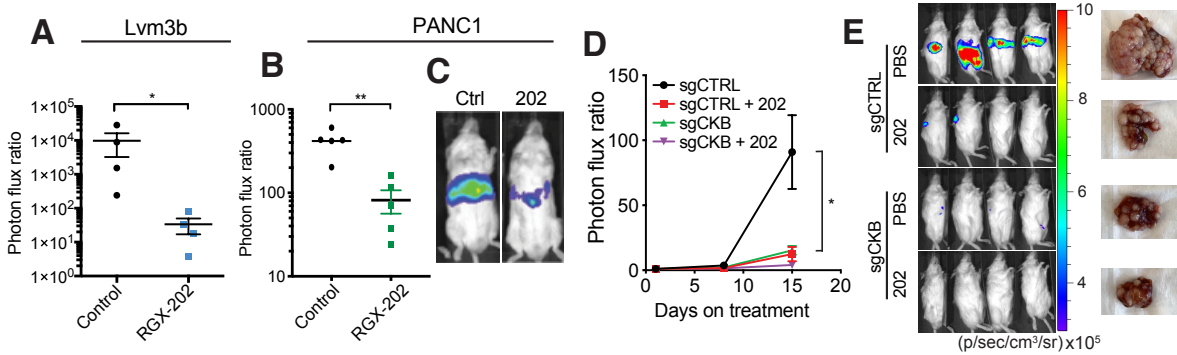

**Fig. S1. RGX-202 inhibits liver colonization of metastatic CRC and pancreatic cell lines**

(A) Bioluminescence plot of liver colonization by  $5 \times 10^5$  human Lvm3b metastatic colon cancer cells after intra-splenic injections into NOD-SCID mice. Treatment with control or RGX-202-formulated diet started on day 1, for the duration of the experiment. Mice were imaged on day 22 after injection. Photon flux ratio is the ratio of bioluminescence signal at day 14 normalized to the signal on day 0;  $n = 4$  per group,  $p = 0.0286$ . (B and C) Bioluminescence plot of liver colonization by  $5 \times 10^5$  human PANC1 pancreatic cells that were pre-treated with RGX-202 at 10 mM for 48h, after intra-splenic injections into NSG mice. Photon flux ratio (B) is the ratio of bioluminescence signal at day 28 normalized to the signal on day 0;  $n = 5$ ,  $p = 0.0079$ . P values are based on Mann-Whitney test. (D) Bioluminescence plot of liver colonization by  $5 \times 10^5$  Lvm3b cells expressing either CRISPR control or CRISPR CKB constructs. Mice received daily i.p. injections of PBS control or RGX-202 (650mg/kg). (E) Gross liver images derived from (D). Photo Credit: Jia Min Loo, the Rockefeller University (B); Norihiro Yamaguchi, the Rockefeller University (E).

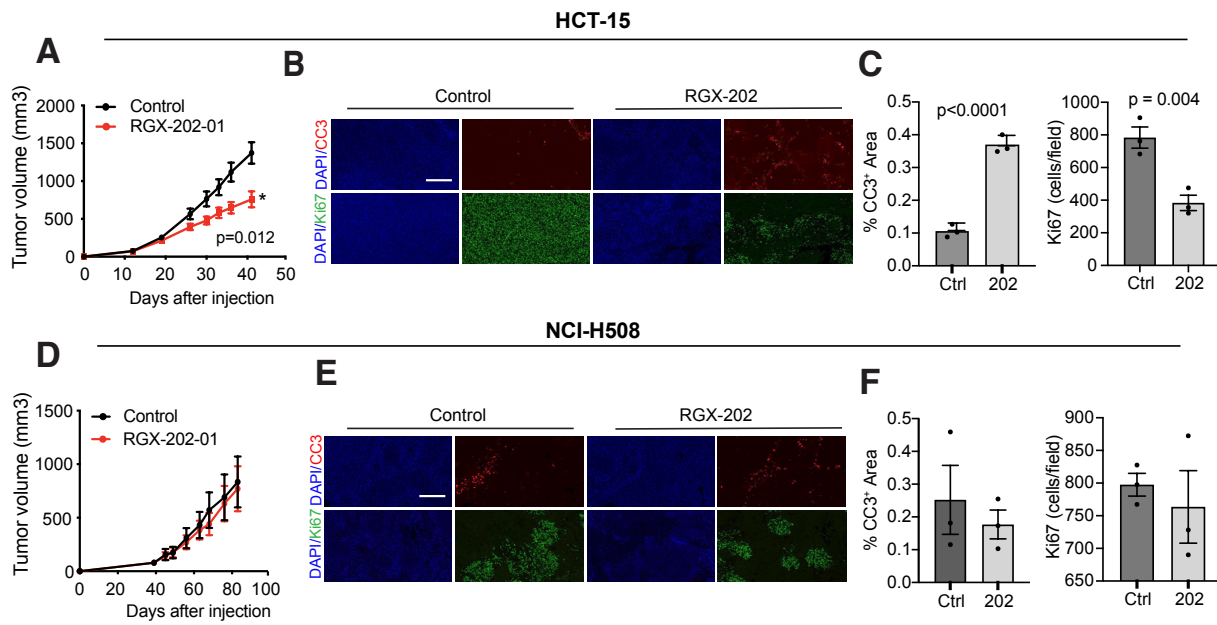

**Fig. S2. Anti-tumor efficacy to RGX-202 is associated with induction of tumor apoptosis and inhibition of proliferation**

(A to F) HCT-15 (A to C) or NCI-H508 (D to F) tumors were extracted from animals that were treated with RGX-202-01 (800 mg/kg) or control diet (A, D, n = 7-11/group) and were immunostained for cleaved-caspase 3 (CC3) or Ki67 and counterstained with DAPI (B and E). Graphs depict quantification of CC3 positive area or the number of Ki67 positive cells in RGX-202 or control diet treated HCT-15 (C) or NCI-H508 (F) tumors. N = 3 tumors per group +/- SEM. Scale bar (B and E) 200 $\mu$ m.

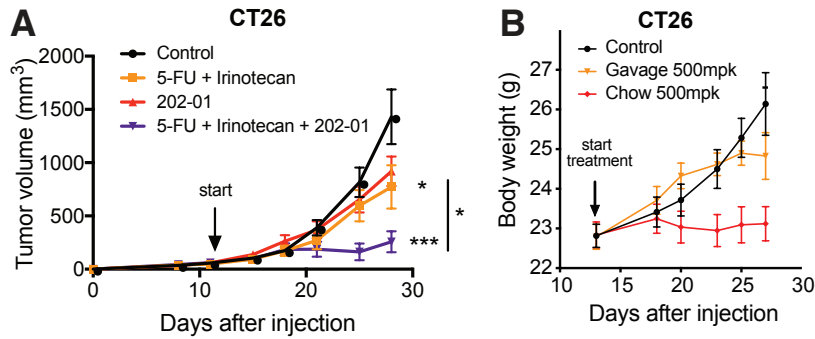

**Fig. S3. Anti-tumor efficacy of RGX-202 in combination with 5-FU and irinotecan**

(A) Tumor growth of  $1.5 \times 10^5$  CT26 cells subcutaneously injected into BALB/c mice. As soon as tumors reached an average of  $50 \text{ mm}^3$ , mice were randomly distributed and received either a control diet, RGX-202-01-supplemented diet ( $\sim 500 \text{ mg/kg}$ ,  $p = 0.092$ ) or a combination of 5-FU (i.p.  $30 \text{ mg/kg/week}$ ) and irinotecan (i.p.  $15 \text{ mg/kg/week}$ ) ( $p = 0.064$ ) or a combination of RGX-202-01, 5-FU and irinotecan ( $p = 0.0006$ );  $n = 7-8$  per group; shown are mean  $\pm$  SEM; All  $p$  values are based on two-sided  $t$  tests;  $*p = 0.02$ . (B) Body weight curves of BALB/c mice harboring CT26 tumors. Mice were treated with RGX-202 administered by oral gavage ( $500 \text{ mg/kg}$ ) or formulated in chow ( $500 \text{ mg/kg}$ ) and body weights were measured twice/week;  $n = 7-11/\text{cohort}$ .

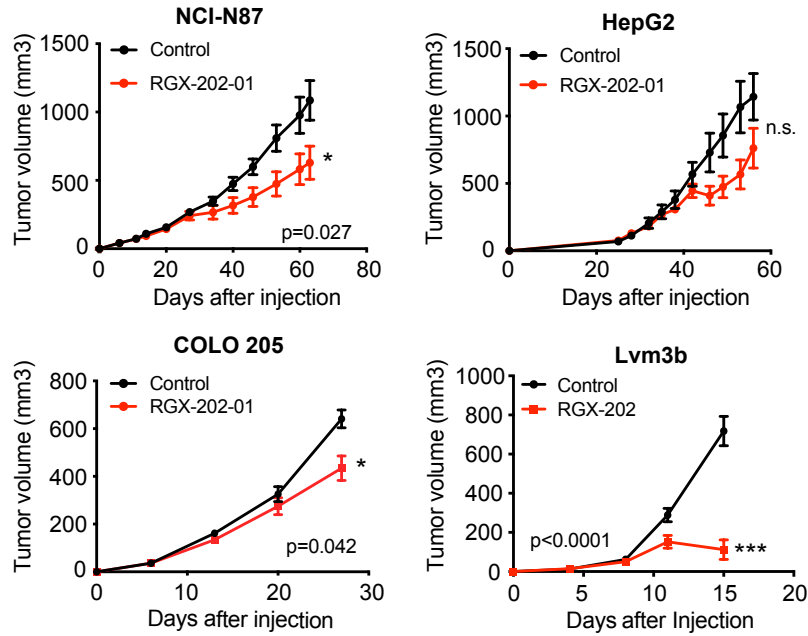

**Fig. S4. Xenograft tumor studies**

Tumor growth of  $4 \times 10^6$  NCI-N87 ( $p = 0.027$ ),  $2 \times 10^6$  HepG2,  $5 \times 10^6$  Colo205 ( $p = 0.042$ ) and  $1 \times 10^6$  Lvm3b ( $p < 0.0001$ ) cells subcutaneously injected into athymic nude mice. Treatment with a control or RGX-202/RGX-202-01-supplemented diet ( $\sim 800$  mg/kg/day) started as soon as tumors reached  $10\text{-}60$  mm<sup>3</sup>;  $n = 8\text{-}10$  per group. All  $p$  values are based on two-sided  $t$  tests; n.s. = not significant. Shown are mean  $\pm$  SEM.

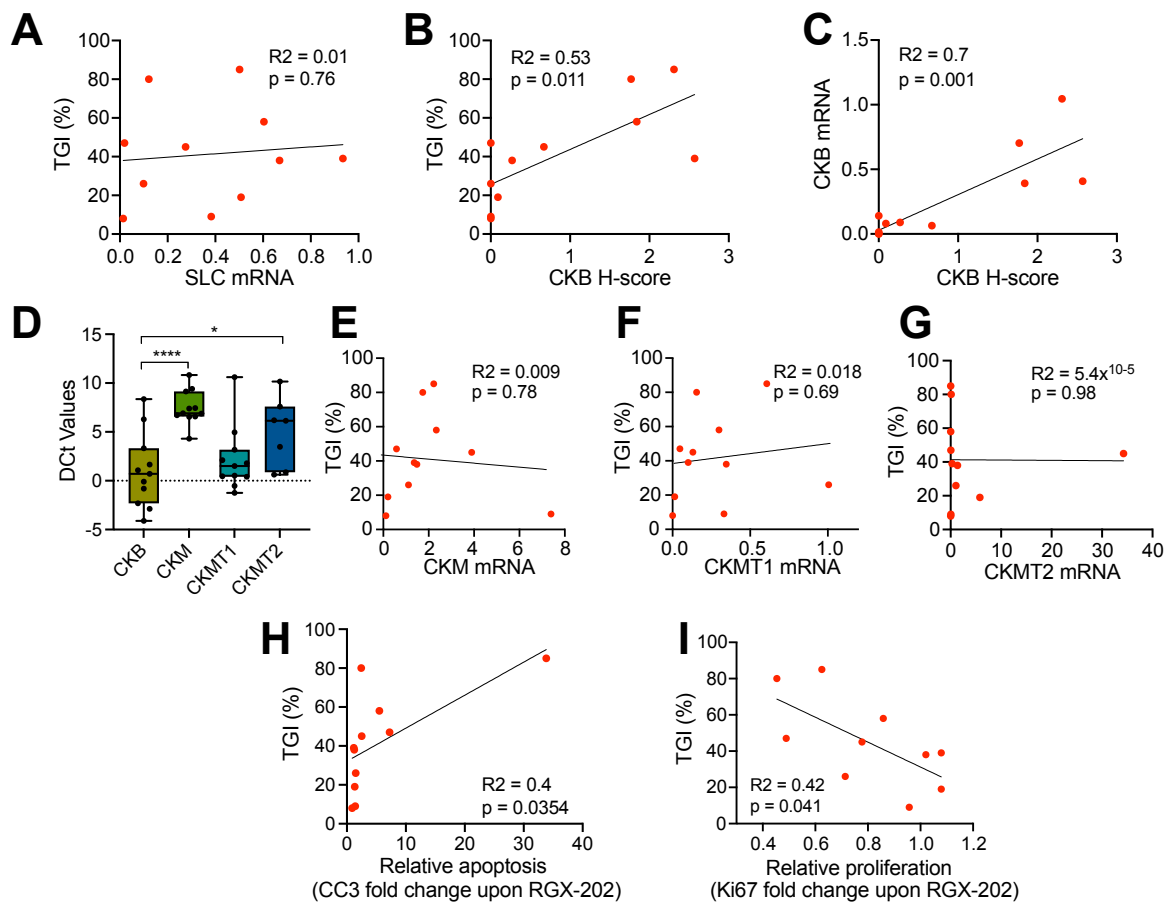

**Fig. S5. Linear regression analysis demonstrates anti-tumor efficacy of RGX-202 in CKB high expressing cell lines**

(A to C) Linear regression analyses of the percentage of tumor growth inhibition (TGI) as a function of SLC6A8 mRNA (A), TGI as a function of CKB H-score (B) and CKB mRNA levels as a function of CKB H-score (C) in the tumors of the xenograft models tested. mRNA levels were measured by qPCR. Each dot represents the mean value of data points from one xenograft model,  $n=4-6$  tumors/xenograft model. (D) qPCR analysis of CKB, CKM, CKMT1 and CKMT2 in the xenograft models tested. Relative expression is shown in  $\Delta C_t$  values;  $n = 7-11$  models; 4-5 tumors/models. Shown is the average  $\pm$  SEM. (E to G) Linear regression analysis of TGI as a function of CKM mRNA (E), CKMT1 mRNA (F) and CKMT2 (G) tumoral mRNA levels. mRNA levels were measured by qPCR; Each dot represents the mean value of data points from

one xenograft model, n=4-5 tumors/xenograft model. **(H-I)** Linear regression analyses of the TGI and the fold change of cleaved caspase-3 (H) or Ki67 (I) positive tumor area assessed by IHC in RGX-202-01-treated tumors relative to control tumors; n = 3 tumors/model. Each dot represents the mean value of data points from one xenograft model.

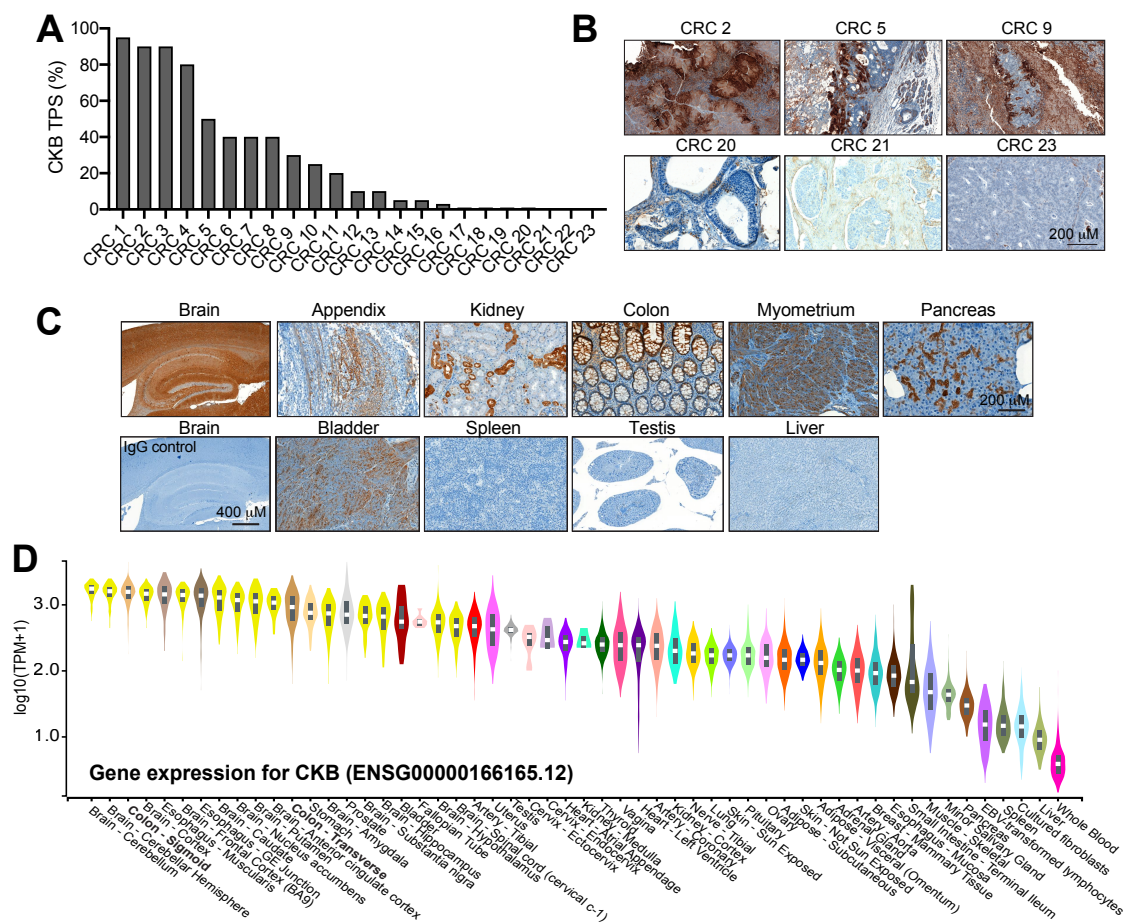

**Fig. S6 CKB expression in patient specimen and healthy tissue**

**(A and B)** CKB expression was assessed by IHC in 23 metastatic CRC specimens. Quantification of TPS is shown in **(A)** and representative images are shown in **(B)**. **(C)** Human tumor microarray (TMA) comprising 10 healthy tissues were immunostained with CKB and counterstained with hematoxylin. Scale bar **(B and C)** 200 $\mu$ m; except brain and IgG control, 400 $\mu$ m. **(D)** Organ-based physiological CKB mRNA expression levels from the Genotype-Tissue Expression (GTEx) database in human specimen. Horizontal bars in box plots show 25, 50, and 75 percentiles.

**Table S1. PDX models utilized in the PDX trial**

Summary of PDX tumor growth data, KRAS and BRAF status. TGI(21) = Tumor growth

inhibition on Day 21 =  $((C_{21}-C_0)/C_{21}) - ((T_{21}-T_0)/T_0)$ . Change in tumor size relative to control.

| Cancer Type | ID      | TGI(21) | Change in tumor size | KRAS    | BRAF  |
|-------------|---------|---------|----------------------|---------|-------|
| CRC         | CR5039  | -3.67   | 147%                 | WT      | WT    |
| CRC         | CR3280  | -3.74   | 141%                 | p.G12R  | D22N  |
| CRC         | CR5053  | -2.78   | 71%                  | p.A146V | WT    |
| CRC         | CR2554  | -1.03   | 44%                  | p.G12V  | WT    |
| CRC         | CR5032  | -1.91   | 41%                  | p.G13D  | WT    |
| CRC         | CR6251  | -2.79   | 29%                  | WT      | WT    |
| CRC         | CR5066  | -0.61   | 24%                  | p.G12C  | WT    |
| CRC         | CR5075  | -1.23   | 17%                  | WT      | V600E |
| CRC         | CR5033  | -0.47   | 14%                  | WT      | WT    |
| CRC         | CR5080  | 0.50    | 6%                   | p.G12D  | WT    |
| CRC         | CR5081  | -0.15   | 1%                   | p.G12D  | WT    |
| CRC         | CR1287  | 0.04    | 0%                   | p.G12D  | WT    |
| CRC         | CR5059  | -0.18   | -2%                  | WT      | V600E |
| CRC         | CR3151  | 0.23    | -2%                  | p.G12A  | WT    |
| CRC         | CR2491  | 0.26    | -4%                  | p.G12V  | WT    |
| CRC         | CR5052  | 0.11    | -5%                  | WT      | V600E |
| CRC         | CR5046  | 0.43    | -8%                  | p.G12R  | WT    |
| CRC         | CR6460  | 2.26    | -14%                 | p.Q61L  | WT    |
| CRC         | CR5082  | 0.35    | -16%                 | WT      | V600E |
| CRC         | CR6863  | 0.55    | -19%                 | WT      | V600E |
| CRC         | CR5043  | 0.57    | -26%                 | p.G13D  | WT    |
| CRC         | CR3085  | 3.28    | -27%                 | WT      | WT    |
| CRC         | CR5058  | 1.81    | -32%                 | WT      | WT    |
| CRC         | CR5044  | 1.69    | -32%                 | WT      | WT    |
| CRC         | CR5048  | 1.00    | -33%                 | p.G12C  | WT    |
| CRC         | CR5038  | -0.07   | -34%                 | p.Q61H  | WT    |
| CRC         | CR5101  | 1.10    | -36%                 | WT      | WT    |
| CRC         | CR2526  | 1.01    | -42%                 | WT      | WT    |
| CRC         | CR5040  | 6.75    | -42%                 | p.G12V  | WT    |
| CRC         | CR2179  | 3.34    | -45%                 | WT      | V600E |
| CRC         | CR6249  | 3.08    | -45%                 | WT      | WT    |
| CRC         | CR11372 | 1.79    | -47%                 | WT      | WT    |
| CRC         | CR6256  | 3.82    | -48%                 | p.G12C  | WT    |
| CRC         | CR1795  | 9.37    | -48%                 | WT      | WT    |
| CRC         | CR5026  | 2.94    | -49%                 | WT      | V600E |
| CRC         | CR3079  | 3.01    | -49%                 | p.G12D  | WT    |
| CRC         | CR3099  | 4.05    | -49%                 | p.G12D  | WT    |
| CRC         | CR2533  | 4.18    | -51%                 | WT      | WT    |
| CRC         | CR5030  | 4.43    | -51%                 | WT      | WT    |
| CRC         | CR3448  | 5.94    | -56%                 | p.G12D  | WT    |
| CRC         | CR2110  | 5.72    | -63%                 | p.G12S  | WT    |
| CRC         | CR5062  | 6.37    | -66%                 | p.G12D  | WT    |
| CRC         | CR1451  | 14.05   | -83%                 | p.G12C  | WT    |



## Table S2. Information on cell lines

Anti-tumor efficacy and mutational status of the cell lines used in the xenograft studies. TGI =

Tumor growth inhibition.

| Cancer Type | Cell line       | TGI | CKB TPS | KRAS | BRAF  | p53   | Mismatch repair mutations |
|-------------|-----------------|-----|---------|------|-------|-------|---------------------------|
| CRC         | <b>HCT-8</b>    | 80% | 75      | G13D |       |       | MSH6                      |
| CRC         | <b>Lvm3b</b>    | 85% | 87      | G12D | V600E |       | MSH3                      |
| CRC         | <b>HCT116</b>   | 58% | 100     | G13D |       |       | MLH1, MSH2, MSH3, MSH6    |
| CRC         | <b>HCT15</b>    | 47% | 0       | G13D |       | S241F | MSH2, MSH6                |
| CRC         | <b>SW480</b>    | 45% | 65      | G12V |       | R273H | wild type                 |
| CRC         | <b>HT29</b>     | 39% | 100     | WT   | V600E | R273H | MLH1, MLH2                |
| CRC         | <b>Colo205</b>  | 26% | 0       | WT   | V600E |       |                           |
| CRC         | <b>NCI-H508</b> | 9%  | 2       | WT   |       | R273H |                           |
| Gastric     | <b>NCI-N87</b>  | 38% | 14      | WT   |       | R248Q |                           |
| Gastric     | <b>Hs746T</b>   | 8%  | 0       | WT   |       | K319  |                           |
| Hepatic     | <b>HepG2</b>    | 19% | 3       | WT   |       |       |                           |
